# Supplementary material
Source: publisher figshare collection journal article supplement (https://gsajournals.figshare.com/ndownloader/files/17545244)
Supplement: Supplementary file 1 [file 17545244]

## Sheet: hybrid_background
Supplementary Data 1. Copper resistance of CUP2 chimeras in hybrids.
plate	strain	well	condition	AUC	nAUC
1	CCCC_S288C	A1	CM	2283.61	1.04151
1	CCCC_S288C	A2	CM	2199.12	1.00298
1	CCCC_S288C	A3	CM	2095.04	0.955509
1	CCCC_S288C	A8	CM + 0.2mM copper	2114.6	0.964429
1	CCCC_S288C	A9	CM + 0.2mM copper	2034.66	0.927969
1	CCCC_S288C	A7	CM + 0.2mM copper	2180.21	0.994353
1	CUUU	A6	CM	2289.77	0.992763
1	CUUU	A4	CM	2269.11	0.983804
1	CUUU	A5	CM	2360.51	1.02343
1	CUUU	A10	CM + 0.2mM copper	565.453	0.24516
1	CUUU	A11	CM + 0.2mM copper	647.866	0.280891
1	CUUU	A12	CM + 0.2mM copper	614.409	0.266385
1	CCCC_oak	B1	CM	2513.22	1.01725
1	CCCC_oak	B2	CM	2493.13	1.00912
1	CCCC_oak	B3	CM	2405.43	0.973625
1	CCCC_oak	B8	CM + 0.2mM copper	2354.67	0.95308
1	CCCC_oak	B9	CM + 0.2mM copper	2382.89	0.964502
1	CCCC_oak	B7	CM + 0.2mM copper	2286.45	0.925468
1	UCUU	B6	CM	2367.9	0.9795
1	UCUU	B4	CM	2415.68	0.999264
1	UCUU	B5	CM	2468.79	1.02124
1	UCUU	B10	CM + 0.2mM copper	1475.79	0.61047
1	UCUU	B11	CM + 0.2mM copper	1548.22	0.640432
1	UCUU	B12	CM + 0.2mM copper	1424.79	0.589377
1	UUUU	C1	CM	2555.68	1.03584
1	UUUU	C2	CM	2451.5	0.993612
1	UUUU	C3	CM	2394.6	0.97055
1	UUUU	C8	CM + 0.2mM copper	412.842	0.167328
1	UUUU	C9	CM + 0.2mM copper	374.984	0.151984
1	UUUU	C7	CM + 0.2mM copper	407.252	0.165062
1	UUCU	C6	CM	2335.7	0.994731
1	UUCU	C4	CM	2300.35	0.979678
1	UUCU	C5	CM	2408.16	1.02559
1	UUCU	C10	CM + 0.2mM copper	801.025	0.341142
1	UUCU	C11	CM + 0.2mM copper	824.311	0.351058
1	UUCU	C12	CM + 0.2mM copper	848.551	0.361382
1	CCUU	D1	CM	2541.57	1.02981
1	CCUU	D2	CM	2468.92	1.00038
1	CCUU	D3	CM	2393.48	0.96981
1	CCUU	D8	CM + 0.2mM copper	2023.32	0.819825
1	CCUU	D9	CM + 0.2mM copper	2061.85	0.835438
1	CCUU	D7	CM + 0.2mM copper	1993.93	0.807916
1	UUUC	D6	CM	2380.67	0.998856
1	UUUC	D4	CM	2373.17	0.995713
1	UUUC	D5	CM	2396.34	1.00543
1	UUUC	D10	CM + 0.2mM copper	518.816	0.21768
1	UUUC	D11	CM + 0.2mM copper	608.336	0.255239
1	UUUC	D12	CM + 0.2mM copper	506.153	0.212367
1	UUCC	E1	CM	2477.73	1.02511
1	UUCC	E2	CM	2394.12	0.990525
1	UUCC	E3	CM	2379.23	0.984361
1	UUCC	E8	CM + 0.2mM copper	1462.28	0.60499
1	UUCC	E9	CM + 0.2mM copper	1361.38	0.563246
1	UUCC	E7	CM + 0.2mM copper	1047.83	0.43352
1	UCCC	E6	CM	2348	1.00484
1	UCCC	E4	CM	2355.52	1.00806
1	UCCC	E5	CM	2306.53	0.987096
1	UCCC	E10	CM + 0.2mM copper	1998.91	0.855447
1	UCCC	E11	CM + 0.2mM copper	2283.53	0.977251
1	UCCC	E12	CM + 0.2mM copper	2115.09	0.905168
1	vector	F1	CM	2395.86	1.00432
1	vector	F2	CM	2372.35	0.994468
1	vector	F3	CM	2388.42	1.00121
1	vector	F8	CM + 0.2mM copper	377.556	0.158268
1	vector	F9	CM + 0.2mM copper	386.347	0.161953
1	vector	F7	CM + 0.2mM copper	315.35	0.132192
1	CUCC	F6	CM	2310.62	1.00534
1	CUCC	F4	CM	2275.53	0.99007
1	CUCC	F5	CM	2308.91	1.00459
1	CUCC	F10	CM + 0.2mM copper	2263.78	0.984957
1	CUCC	F11	CM + 0.2mM copper	2326.99	1.01246
1	CUCC	F12	CM + 0.2mM copper	2225.74	0.968408
1	CCUC	G4	CM	2343.61	1.03023
1	CCUC	G5	CM	2249.31	0.98878
1	CCUC	G6	CM	2231.59	0.980989
1	CCUC	G10	CM + 0.2mM copper	2111.74	0.928306
1	CCUC	G11	CM + 0.2mM copper	2171.65	0.954638
1	CCUC	G12	CM + 0.2mM copper	2206.66	0.970029
1	CCCU	H4	CM	2232.69	1.0292
1	CCCU	H5	CM	2185.56	1.00748
1	CCCU	H6	CM	2089.76	0.963316
1	CCCU	H10	CM + 0.2mM copper	2005.83	0.924627
1	CCCU	H11	CM + 0.2mM copper	1899.44	0.875583
1	CCCU	H12	CM + 0.2mM copper	2004.65	0.924081
2	CCCU	H12	CM + 0.5mM copper	628.949	0.2701
2	CCCU	H11	CM + 0.5mM copper	538.033	0.231056
2	CCCU	H6	CM	2369.63	1.01763
2	CCCU	H5	CM	2253.45	0.967735
2	CCCU	H4	CM	2362.65	1.01463
2	CCCU	H10	CM + 0.5mM copper	570.867	0.245157
2	CCUC	G12	CM + 0.5mM copper	1869.79	0.797772
2	CCUC	G10	CM + 0.5mM copper	2011.58	0.858267
2	CCUC	G4	CM	2387.32	1.01858
2	CCUC	G11	CM + 0.5mM copper	1983.88	0.846448
2	CCUC	G6	CM	2325.08	0.992027
2	CCUC	G5	CM	2318.9	0.989389
2	CUCC	F12	CM + 0.5mM copper	2142.98	0.898537
2	CUCC	F11	CM + 0.5mM copper	2035.35	0.853409
2	CUCC	F10	CM + 0.5mM copper	1980.19	0.830281
2	CUCC	F5	CM	2423.82	1.01629
2	CUCC	F4	CM	2373.33	0.995119
2	CUCC	F6	CM	2357.76	0.988591
2	vector	F7	CM + 0.5mM copper	285.784	0.126909
2	vector	F9	CM + 0.5mM copper	335.82	0.149128
2	vector	F8	CM + 0.5mM copper	353.892	0.157154
2	vector	F3	CM	2255.55	1.00163
2	vector	F2	CM	2345.13	1.04141
2	vector	F1	CM	2154.98	0.956966
2	UCCC	E12	CM + 0.5mM copper	1147.13	0.481962
2	UCCC	E11	CM + 0.5mM copper	1223.14	0.5139
2	UCCC	E10	CM + 0.5mM copper	1359.26	0.571089
2	UCCC	E5	CM	2313.64	0.972069
2	UCCC	E4	CM	2385.51	1.00226
2	UCCC	E6	CM	2441.21	1.02567
2	UUCC	E7	CM + 0.5mM copper	359.495	0.155207
2	UUCC	E9	CM + 0.5mM copper	363.551	0.156958
2	UUCC	E8	CM + 0.5mM copper	434.327	0.187515
2	UUCC	E3	CM	2279.24	0.984031
2	UUCC	E2	CM	2373.39	1.02468
2	UUCC	E1	CM	2296.05	0.991288
2	UUUC	D12	CM + 0.5mM copper	412.868	0.175644
2	UUUC	D11	CM + 0.5mM copper	382.354	0.162663
2	UUUC	D10	CM + 0.5mM copper	420.162	0.178747
2	UUUC	D5	CM	2292.15	0.975139
2	UUUC	D4	CM	2418.98	1.0291
2	UUUC	D6	CM	2340.64	0.995766
2	CCUU	D7	CM + 0.5mM copper	545.135	0.237915
2	CCUU	D9	CM + 0.5mM copper	470.578	0.205376
2	CCUU	D8	CM + 0.5mM copper	568.055	0.247919
2	CCUU	D3	CM	2259.7	0.986213
2	CCUU	D2	CM	2349.85	1.02556
2	CCUU	D1	CM	2264.33	0.988231
2	UUCU	C12	CM + 0.5mM copper	364.853	0.150312
2	UUCU	C11	CM + 0.5mM copper	423.833	0.174611
2	UUCU	C10	CM + 0.5mM copper	462.585	0.190576
2	UUCU	C5	CM	2452.22	1.01027
2	UUCU	C4	CM	2393.11	0.985914
2	UUCU	C6	CM	2436.57	1.00382
2	UUUU	C7	CM + 0.5mM copper	321.456	0.137276
2	UUUU	C9	CM + 0.5mM copper	269.853	0.115239
2	UUUU	C8	CM + 0.5mM copper	316.21	0.135036
2	UUUU	C3	CM	2294.57	0.979883
2	UUUU	C2	CM	2396.33	1.02334
2	UUUU	C1	CM	2334.13	0.996778
2	UCUU	B12	CM + 0.5mM copper	959.867	0.396383
2	UCUU	B11	CM + 0.5mM copper	632.156	0.261053
2	UCUU	B10	CM + 0.5mM copper	574.313	0.237166
2	UCUU	B5	CM	2429.63	1.00333
2	UCUU	B4	CM	2438.31	1.00691
2	UCUU	B6	CM	2396.75	0.989752
2	CCCC_oak	B7	CM + 0.5mM copper	1823.4	0.781304
2	CCCC_oak	B9	CM + 0.5mM copper	1673.63	0.717129
2	CCCC_oak	B8	CM + 0.5mM copper	1796.87	0.769936
2	CCCC_oak	B3	CM	2376.05	1.01811
2	CCCC_oak	B2	CM	2318.89	0.993613
2	CCCC_oak	B1	CM	2306.44	0.98828
2	CUUU	A12	CM + 0.5mM copper	362.947	0.148846
2	CUUU	A11	CM + 0.5mM copper	366.781	0.150418
2	CUUU	A10	CM + 0.5mM copper	445.14	0.182554
2	CUUU	A5	CM	2434.71	0.998484
2	CUUU	A4	CM	2481.79	1.01779
2	CUUU	A6	CM	2398.72	0.983726
2	CCCC_S288C	A7	CM + 0.5mM copper	1989.47	0.90123
2	CCCC_S288C	A9	CM + 0.5mM copper	2226.57	1.00863
2	CCCC_S288C	A8	CM + 0.5mM copper	1990.35	0.901624
2	CCCC_S288C	A3	CM	2276.84	1.03141
2	CCCC_S288C	A2	CM	2182.38	0.988617
2	CCCC_S288C	A1	CM	2163.31	0.979976

## Sheet: S.cerevisiae_background
Supplementary Data 2. Copper resistance of CUP2 chimeras in S. cerevisiae (S288C).
strain	well	condition	AUC	nAUC
CCCC_S288C	A1	CM	2112.56	0.951867
CCCC_S288C	A2	CM	2299.3	1.03601
CCCC_S288C	A3	CM	2246.31	1.01213
CCCC_S288C	A8	CM + 0.5mM copper	2084.51	0.939226
CCCC_S288C	A9	CM + 0.5mM copper	2167.41	0.976579
CCCC_S288C	A7	CM + 0.5mM copper	2133.99	0.961521
CUUU	A6	CM	2107.37	0.972245
CUUU	A4	CM	2226.08	1.02701
CUUU	A5	CM	2169.14	1.00074
CUUU	A10	CM + 0.5mM copper	496.271	0.228957
CUUU	A11	CM + 0.5mM copper	475.157	0.219216
CUUU	A12	CM + 0.5mM copper	431.585	0.199114
CCCC_oak	B1	CM	2186.55	0.984561
CCCC_oak	B2	CM	2177.42	0.980447
CCCC_oak	B3	CM	2298.55	1.03499
CCCC_oak	B8	CM + 0.5mM copper	2161.93	0.973471
CCCC_oak	B9	CM + 0.5mM copper	2142.98	0.964941
CCCC_oak	B7	CM + 0.5mM copper	2111.9	0.950947
UCUU	B6	CM	2155.64	0.985322
UCUU	B4	CM	2215.99	1.01291
UCUU	B5	CM	2191.62	1.00177
UCUU	B10	CM + 0.5mM copper	1548.39	0.707756
UCUU	B11	CM + 0.5mM copper	1599.81	0.731261
UCUU	B12	CM + 0.5mM copper	1291.91	0.590519
UUUU	C1	CM	2188.53	0.990347
UUUU	C2	CM	2175.2	0.984315
UUUU	C3	CM	2265.85	1.02534
UUUU	C8	CM + 0.5mM copper	397.726	0.179978
UUUU	C9	CM + 0.5mM copper	300.871	0.136149
UUUU	C7	CM + 0.5mM copper	292.05	0.132158
UUCU	C6	CM	2054.39	0.921109
UUCU	C4	CM	2357.49	1.05701
UUCU	C5	CM	2279.14	1.02188
UUCU	C10	CM + 0.5mM copper	847.076	0.379797
UUCU	C11	CM + 0.5mM copper	891.541	0.399733
UUCU	C12	CM + 0.5mM copper	689.959	0.309352
CCUU	D1	CM	2172.38	0.954973
CCUU	D2	CM	2291.95	1.00754
CCUU	D3	CM	2360.09	1.03749
CCUU	D8	CM + 0.5mM copper	1960.25	0.861722
CCUU	D9	CM + 0.5mM copper	1932.6	0.849566
CCUU	D7	CM + 0.5mM copper	2017.89	0.887059
UUUC	D6	CM	2132.61	0.95097
UUUC	D4	CM	2260.4	1.00795
UUUC	D5	CM	2334.68	1.04108
UUUC	D10	CM + 0.5mM copper	480.528	0.214276
UUUC	D11	CM + 0.5mM copper	481.123	0.214541
UUUC	D12	CM + 0.5mM copper	431.648	0.19248
UUCC	E1	CM	2284.33	1.01589
UUCC	E2	CM	2248.37	0.999891
UUCC	E3	CM	2213.14	0.984224
UUCC	E8	CM + 0.5mM copper	1620.62	0.720722
UUCC	E9	CM + 0.5mM copper	1471.5	0.654404
UUCC	E7	CM + 0.5mM copper	1470.72	0.654055
UCCC	E6	CM	2165.12	0.972219
UCCC	E4	CM	2251.21	1.01088
UCCC	E5	CM	2264.63	1.0169
UCCC	E10	CM + 0.5mM copper	2154.33	0.967373
UCCC	E11	CM + 0.5mM copper	2153.6	0.967044
UCCC	E12	CM + 0.5mM copper	1953.71	0.877288
vector	F1	CM	2125.78	0.979047
vector	F2	CM	2159.56	0.994604
vector	F3	CM	2228.48	1.02635
vector	F8	CM + 0.5mM copper	367.08	0.169062
vector	F9	CM + 0.5mM copper	369.344	0.170105
vector	F7	CM + 0.5mM copper	358.571	0.165143
CUCC	F6	CM	2161.4	0.956793
CUCC	F4	CM	2281.25	1.00985
CUCC	F5	CM	2334.36	1.03336
CUCC	F10	CM + 0.5mM copper	2207.59	0.977242
CUCC	F11	CM + 0.5mM copper	2207.31	0.977114
CUCC	F12	CM + 0.5mM copper	2110.96	0.934466
CCUC	G4	CM	2086.08	0.974768
CCUC	G5	CM	2241.22	1.04726
CCUC	G6	CM	2092.95	0.977974
CCUC	G10	CM + 0.5mM copper	2085.66	0.974571
CCUC	G11	CM + 0.5mM copper	2144.05	1.00185
CCUC	G12	CM + 0.5mM copper	1962.77	0.917148
CCCU	H4	CM	2146.7	1.00076
CCCU	H5	CM	2236.94	1.04282
CCCU	H6	CM	2051.61	0.956424
CCCU	H10	CM + 0.5mM copper	2065.19	0.962756
CCCU	H11	CM + 0.5mM copper	1985.47	0.92559
CCCU	H12	CM + 0.5mM copper	1936.17	0.90261
